# Supplementary material for: Changes in serum sodium concentration during hemodialysis is a predictor of mortality and cardio-cerebrovascular event
Source: PubMed Central journal article supplement — Ren Fail. 2024 Apr 11;46(1):2338483. doi: 10.1080/0886022X.2024.2338483 (PMC11011235; doi:10.1080/0886022x.2024.2338483), 2024-04-11
Supplement: IRNF_A_2338483_SM3138.pdf [file IRNF_A_2338483_SM3138.pdf]

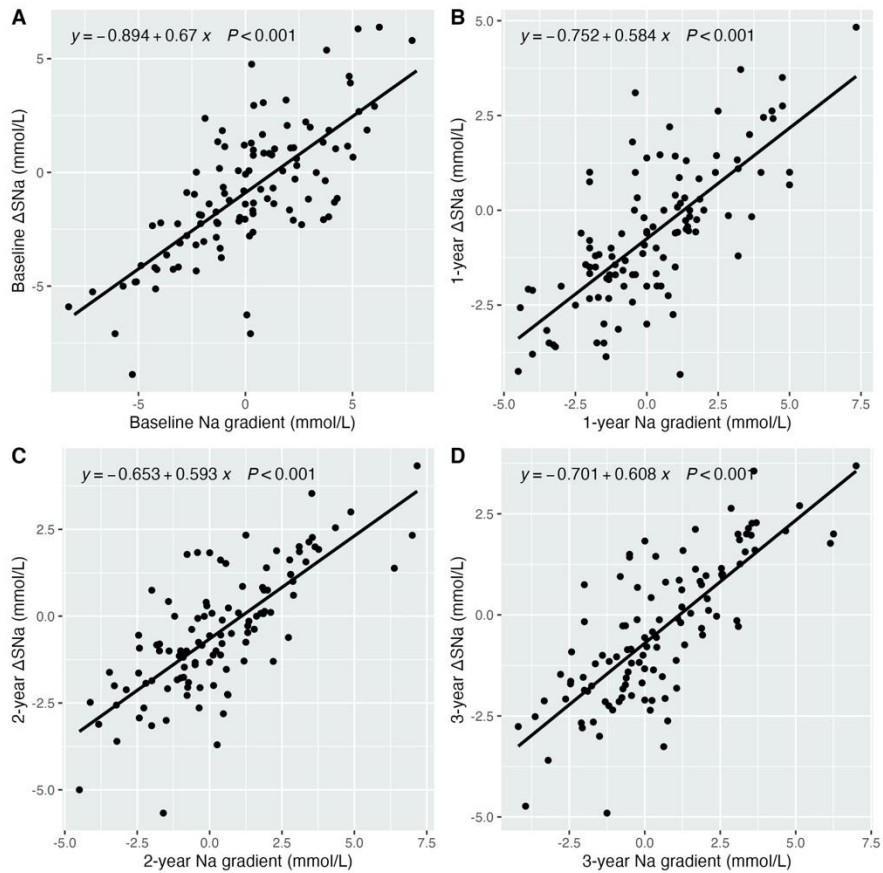

2 **Figure S1.** Correlation between baseline and time-averaged Na gradient and  $\Delta$ SNa. Scatter plots and  
 3 linear regression curves depicting the relationship between Na gradient and  $\Delta$ SNa at (A) baseline, (B)  
 4 within the 1-year interval, (C) 2-year interval, and (D) 3-year interval.

5

6 **Table S1** Information of cancer patient included in the cohort.

| Number | Gender | Tumor location   | Time of enrollment | Time of diagnosis and treatment | Disease progression in the study period |
|--------|--------|------------------|--------------------|---------------------------------|-----------------------------------------|
| 1      | Female | Bladder          | 2013-11-01         | 2008-01                         | No                                      |
| 2      | Female | Skin             | 2013-12-03         | 2011-01                         | No                                      |
| 3      | Female | Endometrium      | 2013-12-06         | 2011-04                         | No                                      |
| 4      | Male   | Bladder          | 2013-12-20         | 2006-01                         | No                                      |
| 5      | Female | Bladder          | 2013-12-21         | 2009-01                         | No                                      |
| 6      | Female | Breast           | 2013-12-13         | 2009-03                         | No                                      |
| 7      | Male   | Bladder          | 2013-12-30         | 2013-08                         | No                                      |
| 8      | Female | Ureter           | 2014-01-05         | 2013-09                         | No                                      |
| 9      | Male   | Multiple myeloma | 2014-01-12         | 2013-06                         | No                                      |
| 10     | Female | Multiple myeloma | 2014-01-27         | 2008-05                         | No                                      |

|    |        |         |            |         |    |
|----|--------|---------|------------|---------|----|
| 11 | Female | Breast  | 2014-03-14 | 2008-04 | No |
| 12 | Male   | Bladder | 2014-03-21 | 1996-01 | No |
| 13 | Female | Kidney  | 2014-03-22 | 1988-11 | No |

7

8 **Table S2** 1-year averaged characteristics of the participants.

| Characteristics          | Total<br>n = 110    | 1-year $\Delta$ SNa $\geq$ 0<br>n = 38 | 1-year $\Delta$ SNa < 0<br>n = 72 | P      |
|--------------------------|---------------------|----------------------------------------|-----------------------------------|--------|
| Age (years)              | 57.1 $\pm$ 12.43    | 57.84 $\pm$ 13.67                      | 56.71 $\pm$ 11.80                 | 0.651  |
| Male, n (%)              | 55 (50.0)           | 14 (36.8)                              | 41 (56.9)                         | 0.071  |
| BMI (kg/m <sup>2</sup> ) | 22.72 $\pm$ 3.76    | 22.83 $\pm$ 2.76                       | 22.66 $\pm$ 4.21                  | 0.826  |
| Smoking habit, n (%)     | 39 (35.5)           | 9 (23.7)                               | 30 (41.7)                         | 0.096  |
| Drinking habit, n (%)    | 40 (36.4)           | 6 (15.8)                               | 34 (47.2)                         | 0.002  |
| Comorbidities, n (%)     |                     |                                        |                                   |        |
| DM                       | 24 (21.8)           | 8 (21.1)                               | 16 (22.2)                         | 1.000  |
| Hypertension             | 108 (98.2)          | 36 (94.7)                              | 72 (100.0)                        | 0.225  |
| CCVD                     | 18 (16.4)           | 4 (10.5)                               | 14 (19.4)                         | 0.352  |
| Malignant tumor          | 13 (11.8)           | 6 (15.8)                               | 7 (9.7)                           | 0.531  |
| Dialysis parameters      |                     |                                        |                                   |        |
| UF (L)                   | 2.31 $\pm$ 0.98     | 2.32 $\pm$ 1.13                        | 2.31 $\pm$ 0.91                   | 0.965  |
| Dry weight (kg)          | 62.15 $\pm$ 11.97   | 60.81 $\pm$ 8.69                       | 62.79 $\pm$ 13.27                 | 0.433  |
| Kt/V                     | 1.42 $\pm$ 0.25     | 1.41 $\pm$ 0.23                        | 1.43 $\pm$ 0.26                   | 0.596  |
| Vintage (months)         | 72.83 $\pm$ 59.99   | 62.87 $\pm$ 54.51                      | 78.08 $\pm$ 62.42                 | 0.207  |
| Laboratory parameters*   |                     |                                        |                                   |        |
| Pre-HD SNa (mmol/L)      | 137.83 $\pm$ 2.32   | 136.02 $\pm$ 2.11                      | 138.78 $\pm$ 1.80                 | <0.001 |
| $\Delta$ SNa (mmol/L)    | -0.65 $\pm$ 1.87    | 1.40 $\pm$ 1.17                        | -1.73 $\pm$ 1.09                  | <0.001 |
| Alb (g/L)                | 40.19 $\pm$ 3.57    | 38.86 $\pm$ 4.07                       | 40.89 $\pm$ 3.09                  | 0.004  |
| Hb (g/L)                 | 112.34 $\pm$ 8.66   | 112.25 $\pm$ 10.13                     | 112.39 $\pm$ 7.85                 | 0.936  |
| Cr (umol/L)              | 985.42 $\pm$ 209.34 | 931.26 $\pm$ 198.14                    | 1014.01 $\pm$ 210.76              | 0.048  |
| BUN (mmol/L)             | 27.07 $\pm$ 4.08    | 26.76 $\pm$ 4.80                       | 27.24 $\pm$ 3.66                  | 0.557  |
| K (mmol/L)               | 5.13 $\pm$ 0.52     | 5.18 $\pm$ 0.55                        | 5.11 $\pm$ 0.51                   | 0.514  |
| Ca (mmol/L)              | 2.27 $\pm$ 0.17     | 2.26 $\pm$ 0.17                        | 2.28 $\pm$ 0.17                   | 0.498  |
| P (mmol/L)               | 1.79 $\pm$ 0.34     | 1.82 $\pm$ 0.39                        | 1.77 $\pm$ 0.31                   | 0.462  |
| PTH (pg/mL)              | 478.71 $\pm$ 467.57 | 492.12 $\pm$ 473.17                    | 471.64 $\pm$ 467.77               | 0.828  |
| UA (umol/L)              | 430.77 $\pm$ 60.98  | 424.04 $\pm$ 69.70                     | 434.32 $\pm$ 56.04                | 0.403  |
| CRP (mg/L)               | 6.05 $\pm$ 11.42    | 6.71 $\pm$ 13.09                       | 5.71 $\pm$ 10.51                  | 0.664  |
| Ferr (ng/mL)             | 447.93 $\pm$ 274.71 | 421.36 $\pm$ 281.73                    | 461.96 $\pm$ 271.88               | 0.464  |
| TG (mmol/L)              | 1.57 $\pm$ 0.96     | 1.62 $\pm$ 1.06                        | 1.54 $\pm$ 0.90                   | 0.689  |
| TC (mmol/L)              | 4.20 $\pm$ 0.92     | 4.08 $\pm$ 0.79                        | 4.26 $\pm$ 0.97                   | 0.304  |
| HDL-C (mmol/L)           | 1.11 $\pm$ 0.35     | 1.08 $\pm$ 0.36                        | 1.13 $\pm$ 0.35                   | 0.483  |
| LDL-C (mmol/L)           | 2.35 $\pm$ 0.72     | 2.24 $\pm$ 0.71                        | 2.40 $\pm$ 0.72                   | 0.270  |

9 \* The laboratory parameters represent the 1-year averaged values.

10

11 **Table S3** 2-year averaged characteristics of the participants.

| Characteristics          | Total<br>n = 110 | 1-year $\Delta$ SNa $\geq$ 0<br>n = 44 | 1-year $\Delta$ SNa < 0<br>n = 66 | P     |
|--------------------------|------------------|----------------------------------------|-----------------------------------|-------|
| Age (years)              | 57.1 $\pm$ 12.43 | 58.68 $\pm$ 13.44                      | 56.05 $\pm$ 11.70                 | 0.278 |
| Male, n (%)              | 55 (50.0)        | 20 (45.5)                              | 35 (53.0)                         | 0.559 |
| BMI (kg/m <sup>2</sup> ) | 22.72 $\pm$ 3.76 | 22.60 $\pm$ 2.70                       | 22.80 $\pm$ 4.34                  | 0.783 |
| Smoking habit, n (%)     | 39 (35.5)        | 12 (27.3)                              | 27 (40.9)                         | 0.207 |

|                        |                 |                 |                  |        |
|------------------------|-----------------|-----------------|------------------|--------|
| Drinking habit, n (%)  | 40 (36.4)       | 10 (22.7)       | 30 (45.5)        | 0.026  |
| Comorbidities, n (%)   |                 |                 |                  |        |
| DM                     | 24 (21.8)       | 11 (25.0)       | 13 (80.3)        | 0.671  |
| Hypertension           | 108 (98.2)      | 42 (95.5)       | 66 (100.0)       | 0.308  |
| CCVD                   | 18 (16.4)       | 4 (9.1)         | 14 (21.2)        | 0.155  |
| Malignant tumor        | 13 (11.8)       | 7 (15.9)        | 6 (9.1)          | 0.433  |
| Dialysis parameters    |                 |                 |                  |        |
| UF (L)                 | 2.31 ± 0.98     | 2.28 ± 1.12     | 2.33 ± 0.90      | 0.832  |
| Dry weight (kg)        | 62.15 ± 11.97   | 61.05 ± 8.80    | 62.80 ± 13.52    | 0.471  |
| Kt/V                   | 1.42 ± 0.25     | 1.41 ± 0.22     | 1.43 ± 0.26      | 0.630  |
| Vintage (months)       | 72.83 ± 59.99   | 62.98 ± 52.72   | 79.39 ± 63.93    | 0.161  |
| Laboratory parameters* |                 |                 |                  |        |
| Pre-HD SNa (mmol/L)    | 137.68 ± 2.26   | 135.97 ± 2.09   | 138.82 ± 1.55    | <0.001 |
| ΔSNa (mmol/L)          | -0.46 ± 1.79    | 1.28 ± 1.02     | -1.63 ± 1.10     | <0.001 |
| Alb (g/L)              | 40.27 ± 3.45    | 39.22 ± 3.91    | 40.97 ± 2.93     | 0.009  |
| Hb (g/L)               | 112.19 ± 8.44   | 112.23 ± 9.81   | 112.17 ± 7.46    | 0.968  |
| Cr (μmol/L)            | 988.37 ± 210.79 | 928.05 ± 193.78 | 1028.58 ± 213.46 | 0.014  |
| BUN (mmol/L)           | 26.69 ± 3.63    | 26.12 ± 4.20    | 27.07 ± 3.18     | 0.180  |
| K (mmol/L)             | 5.14 ± 0.48     | 5.18 ± 0.45     | 5.12 ± 0.49      | 0.519  |
| Ca (mmol/L)            | 2.28 ± 0.16     | 2.26 ± 0.17     | 2.29 ± 0.16      | 0.310  |
| P (mmol/L)             | 1.77 ± 0.30     | 1.76 ± 0.30     | 1.77 ± 0.30      | 0.916  |
| PTH (pg/mL)            | 481.01 ± 437.41 | 508.49 ± 428.83 | 462.69 ± 445.35  | 0.593  |
| UA (μmol/L)            | 425.51 ± 57.55  | 416.46 ± 63.12  | 431.55 ± 53.15   | 0.179  |
| CRP (mg/L)             | 6.25 ± 12.09    | 7.36 ± 14.06    | 5.51 ± 10.63     | 0.435  |
| Ferr (ng/mL)           | 424.56 ± 228.52 | 418.00 ± 219.28 | 428.94 ± 236.04  | 0.807  |
| TG (mmol/L)            | 1.59 ± 0.95     | 1.62 ± 1.04     | 1.56 ± 0.89      | 0.745  |
| TC (mmol/L)            | 4.22 ± 0.93     | 4.12 ± 0.80     | 4.28 ± 1.01      | 0.365  |
| HDL-C (mmol/L)         | 1.11 ± 0.35     | 1.09 ± 0.37     | 1.12 ± 0.34      | 0.715  |
| LDL-C (mmol/L)         | 2.35 ± 0.71     | 2.25 ± 0.68     | 2.41 ± 0.73      | 0.268  |

12 \* The laboratory parameters represent the 2-year averaged values.

13

14 **Table S4** 3-year averaged characteristics of the participants.

| Characteristics          | Total<br>n = 110 | 1-year ΔSNa ≥ 0<br>n = 42 | 1-year ΔSNa < 0<br>n = 68 | P      |
|--------------------------|------------------|---------------------------|---------------------------|--------|
| Age (years)              | 57.1 ± 12.43     | 59.00 ± 13.86             | 55.93 ± 11.40             | 0.209  |
| Male, n (%)              | 55 (50.0)        | 23 (54.8)                 | 32 (47.1)                 | 0.556  |
| BMI (kg/m <sup>2</sup> ) | 22.72 ± 3.76     | 22.16 ± 3.23              | 23.07 ± 4.03              | 0.218  |
| Smoking habit, n (%)     | 39 (35.5)        | 14 (33.3)                 | 25 (36.8)                 | 0.873  |
| Drinking habit, n (%)    | 40 (36.4)        | 10 (23.8)                 | 30 (44.1)                 | 0.052  |
| Comorbidities, n (%)     |                  |                           |                           |        |
| DM                       | 24 (21.8)        | 11 (26.2)                 | 13 (19.1)                 | 0.525  |
| Hypertension             | 108 (98.2)       | 40 (95.2)                 | 68 (100.0)                | 0.279  |
| CCVD                     | 18 (16.4)        | 4 (9.5)                   | 14 (20.6)                 | 0.208  |
| Malignant tumor          | 13 (11.8)        | 6 (14.3)                  | 7 (10.3)                  | 0.744  |
| Dialysis parameters      |                  |                           |                           |        |
| UF (L)                   | 2.31 ± 0.98      | 2.31 ± 1.21               | 2.31 ± 0.84               | 0.981  |
| Dry weight (kg)          | 62.15 ± 11.97    | 60.31 ± 9.92              | 63.15 ± 12.91             | 0.247  |
| Kt/V                     | 1.42 ± 0.25      | 1.41 ± 0.23               | 1.44 ± 0.26               | 0.581  |
| Vintage (months)         | 72.83 ± 59.99    | 65.69 ± 59.43             | 77.24 ± 60.35             | 0.329  |
| Laboratory parameters*   |                  |                           |                           |        |
| Pre-HD SNa (mmol/L)      | 137.51 ± 2.23    | 135.70 ± 1.94             | 138.63 ± 1.56             | <0.001 |

|                |                 |                 |                  |        |
|----------------|-----------------|-----------------|------------------|--------|
| ΔSNa (mmol/L)  | -0.40 ± 1.75    | 1.45 ± 0.84     | -1.55 ± 1.04     | <0.001 |
| Alb (g/L)      | 40.32 ± 3.42    | 39.04 ± 3.89    | 41.11 ± 2.84     | 0.002  |
| Hb (g/L)       | 111.55 ± 7.50   | 111.49 ± 9.62   | 111.58 ± 5.89    | 0.952  |
| Cr (umol/L)    | 977.19 ± 208.39 | 916.03 ± 192.57 | 1014.97 ± 210.16 | 0.015  |
| BUN (mmol/L)   | 26.34 ± 3.67    | 25.84 ± 3.92    | 26.65 ± 3.51     | 0.262  |
| K (mmol/L)     | 5.14 ± 0.48     | 5.11 ± 0.44     | 5.16 ± 0.51      | 0.628  |
| Ca (mmol/L)    | 2.28 ± 0.16     | 2.26 ± 0.17     | 2.29 ± 0.15      | 0.319  |
| P (mmol/L)     | 1.75 ± 0.29     | 1.75 ± 0.29     | 1.75 ± 0.29      | 0.980  |
| PTH (pg/mL)    | 474.79 ± 400.21 | 514.13 ± 384.35 | 450.49 ± 410.62  | 0.420  |
| UA (umol/L)    | 423.45 ± 56.18  | 417.12 ± 51.71  | 427.37 ± 58.80   | 0.355  |
| CRP (mg/L)     | 6.13 ± 11.43    | 7.64 ± 13.12    | 5.20 ± 10.25     | 0.277  |
| Ferr (ng/mL)   | 411.87 ± 206.34 | 384.99 ± 202.13 | 428.47 ± 208.65  | 0.285  |
| TG (mmol/L)    | 1.64 ± 1.04     | 1.56 ± 0.94     | 1.68 ± 1.09      | 0.555  |
| TC (mmol/L)    | 4.23 ± 0.94     | 3.98 ± 0.79     | 4.39 ± 0.99      | 0.026  |
| HDL-C (mmol/L) | 1.10 ± 0.35     | 1.05 ± 0.36     | 1.14 ± 0.34      | 0.203  |
| LDL-C (mmol/L) | 2.34 ± 0.71     | 2.20 ± 0.61     | 2.42 ± 0.76      | 0.121  |

15 \* The laboratory parameters represent the 3-year averaged values.

16
